# Supplementary material for: Is Breast Cancer Risk Associated with Menopausal Hormone Therapy Modified by Current or Early Adulthood BMI or Age of First Pregnancy?
Source: MDPI journal article supplement (doi:10.3390/cancers13112710), 2021-05-31
Supplement: s1 [file s1]

Table S4 HRT status and BC risk fully adjusted with interaction term for age of first pregnancy

|                                   | <b>N% no BC/N % no BC</b> | <b>HR</b> | <b>95%CI</b> |
|-----------------------------------|---------------------------|-----------|--------------|
| <b>Never</b>                      | 998 (2.8)/ 34397 (97.2)   | 1         |              |
| <b>Current</b>                    | 158 (3.6)/ 4182 (96.4)    | 1,34      | 1.06-1.70    |
| <b>Former</b>                     | 507 (3.2)/ 15366 (96.8)   | 0,93      | 0.79-1.09    |
| Age                               |                           | 1,02      | 1.01-1.03    |
| HRTcurrent*Age at First Pregnancy |                           | 1,00      | 0.98-1.02    |
| HRTformer*Age at First Pregnancy  |                           | 0,99      | 0.98-1.00    |
| Age at first pregnancy            |                           | 1,00      | 1.00-1.01    |
| Oophorectomy                      |                           | 0,88      | 0.75-1.03    |
| Family History                    |                           | 1,26      | 1.14-1.40    |
| BMI                               |                           | 1,16      | 1.11-1.23    |
| BMI20                             |                           | 0,77      | 0.69-0.86    |
| BMI*BMI20                         |                           | 0,97      | 0.91-1.03    |
| Height                            |                           | 1,07      | 1.03-1.11    |
| Age at Menopause                  |                           | 1,00      | 1.00-1.003   |
| Age at Menarche                   |                           | 0,99      | 0.96-1.02    |
| Exercise                          |                           | 0,99      | 0.99-1.00    |
| Alcohol                           |                           | 1,01      | 1.00-1.01    |
| Postmenopausal Status             |                           | 1,04      | 0.87-1.23    |
| Ethnic origin                     |                           | 1,07      | 0.86-1.33    |
