# Supplementary material for: Is Breast Cancer Risk Associated with Menopausal Hormone Therapy Modified by Current or Early Adulthood BMI or Age of First Pregnancy?
Source: MDPI journal article supplement (doi:10.3390/cancers13112710), 2021-05-31
Supplement: s1 [file s1]

Table S3 characteristics of women with known and unknown HRT status

|                                  | HRT Status       |                  |
|----------------------------------|------------------|------------------|
|                                  | Total            | Unknown          |
| <b>Number of women</b>           | 56489            | 514              |
| Ethnicity                        |                  |                  |
| White                            | 53571 (94.8)     | 460 (89.5)       |
| Other                            | 2918 (5.2)       | 54 (10.5)        |
| Age at study entry (years)       |                  |                  |
| Median (IQR)                     | 56.9 (51.6-63.6) | 54.7 (51.0-63.2) |
| Mean (SD)                        | 57.8 (7.0)       | 57.1 (7.4)       |
| Menopausal status                |                  |                  |
| premenopausal and perimenopausal | 18764 (33.2)     | 217 (42.3)       |
| postmenopausal                   | 37725 (66.8)     | 297 (57.8)       |
| Age at menopause                 |                  |                  |
| Median (IQR)                     | 50.0 (46.0-53.0) | 50.0 (48.0-55.0) |
| Mean (SD)                        | 49.0 (5.6)       | 49.7 (5.3)       |
| Age at menarche                  |                  |                  |
| Median (IQR)                     | 13.0 (12.0-14.0) | 13.0 (12.0-14.0) |
| Mean (SD)                        | 12.9 (1.6)       | 13.0 (1.6)       |
| BMI                              |                  |                  |
| Underweight or normal weight     | 20216 (35.9)     | 136 (26.6)       |
| Overweight                       | 22249 (39.5)     | 234 (45.7)       |
| Obese                            | 13808 (24.6)     | 142 (27.7)       |
| Median (IQR)                     | 26.4 (23.8-29.9) | 26.4 (24.6-30.8) |
| Mean (SD)                        | 27.4 (5.4)       | 28.2 (6.0)       |
| BMI at age 20                    |                  |                  |
| Underweight or normal weight     | 50119 (88.8)     | 451 (87.7)       |
| Overweight                       | 5105 (9.0)       | 45 (8.8)         |
| Obese                            | 1243 (2.2)       | 18 (3.5)         |
| Median (IQR)                     | 21.6 (20.3-23.0) | 21.6 (20.3-23.0) |
| Mean (SD)                        | 22.0 (3.1)       | 22.0 (3.1)       |
| Median Height (m) (IQR)          | 1.62 (0.07)      | 1.63 (1.57-1.65) |
| Mean Height (m) (SD)             | 1.63 (1.57-1.65) | 1.62 (0.07)      |
| Oophorectomy                     |                  |                  |
| Yes                              | 6696 (12.0)      | 45 (8.8)         |

|                                            |                  |                  |
|--------------------------------------------|------------------|------------------|
| No                                         | 49693 (88.0)     | 469 (91.2)       |
| VAS Density                                |                  |                  |
| Median (IQR)                               | 24.8 (14.9-35.8) | 23.3 (15.1-34.0) |
| Mean (SD)                                  | 27.1 (16.2)      | 26.3 (15.7)      |
| Family History of Breast or Ovarian Cancer |                  |                  |
| Yes                                        | 15738 (27.9)     | 145 (28.2)       |
| No                                         | 40748 (72.1)     | 369 (71.8)       |
| Median exercise hours per week (IQR)       | 3.5 (1.5-7.0)    | 3.5 (2.0-5.0)    |
| Median alcohol units per week (IQR)        | 4.0 (5.0-10.0)   | 4.0 (0.0-8.0)    |
| Parity and age at first pregnancy          |                  |                  |
| Nulliparous                                | 7330 (13.0)      | 71 (13.8)        |
| <30                                        | 41408 (73.3)     | 382 (74.3)       |
| ≥30                                        | 7751 (13.7)      | 61 (11.9)        |
| Median age at first pregnancy (IQR)        | 24.0 (21.0-28.0) | 23.0 (20.0-27.0) |
| Mean age at first pregnancy (SD)           | 24.4 (5.3)       | 23.8 (5.0)       |
| Median EIMD score 2010 (IQR)               | 18.9 (10.4-35.1) | 25.5 (12.3-43.6) |
