# Supplementary material for: Is Breast Cancer Risk Associated with Menopausal Hormone Therapy Modified by Current or Early Adulthood BMI or Age of First Pregnancy?
Source: MDPI journal article supplement (doi:10.3390/cancers13112710), 2021-05-31
Supplement: s1 [file s1]

Table S2a. HRT status and BC risk fully adjusted model including current BMI interaction term

| HRT use status               |                         | Age adj.         | Fully adj.        |
|------------------------------|-------------------------|------------------|-------------------|
|                              | N%BC/N% no BC           | HR (95% CI)      | HR (95% CI)       |
| <b>Never</b>                 | 998 (2.8)/ 34397 (97.2) | 1.00             | 1.00              |
| <b>Former</b>                | 507 (3.2)/ 15366 (96.8) | 0.98 (0.88-1.10) | 1.03 (0.91-1.17)  |
| <b>Current</b>               | 158 (3.6)/ 4182 (96.4)  | 1.27 (1.07-1.50) | 1.35 (1.13-1.60)  |
| Age                          |                         | 1.02 (1.01-1.02) | 1.02 (1.01-1.03)  |
| BMI                          |                         |                  | 1.23 (1.16-1.30)  |
| Height                       |                         |                  | 1.06 (1.02-1.10)  |
| BMI20                        |                         |                  | 0.77 (0.69-0.87)  |
| HRTcurrent*BMI               |                         |                  | 0.81 (0.67-0.98)  |
| HRTformer*BMI                |                         |                  | 0.91 (0.82-1.01)  |
| BMI*BMI20                    |                         |                  | 0.96 (0.90-1.02)  |
| Age at first pregnancy <20   |                         |                  | 0.84 (0.70-1.01)  |
| Age at first pregnancy 20-24 |                         |                  | 0.80 (0.69-0.94)  |
| Age at first pregnancy 25-29 |                         |                  | 0.95 (0.81-1.12)  |
| Age at first pregnancy 30-34 |                         |                  | 1.02 (0.84-1.24)  |
| Age at first pregnancy ≥35   |                         |                  | 1.39 (1.08-1.77)  |
| Age at menopause             |                         |                  | 1.00 (1.00-1.003) |
| Family History               |                         |                  | 1.27 (1.14-1.40)  |
| Postmenopausal status        |                         |                  | 1.04 (0.87-1.24)  |
| Exercise                     |                         |                  | 0.995 (0.99-1.00) |
| Alcohol                      |                         |                  | 1.008 (1.00-1.01) |
| Age at menarche              |                         |                  | 0.99 (0.96-1.02)  |
| Oophorectomy                 |                         |                  | 0.89 (0.76-1.05)  |
| Ethnic origin                |                         |                  | 1.06 (0.85-1.33)  |

Table S2b. Fully adjusted model including BMI20 interaction term

| HRT use status | N%BC/N% no BC | HR (95% CI) |
|----------------|---------------|-------------|
|----------------|---------------|-------------|

|                              |                         |                   |
|------------------------------|-------------------------|-------------------|
| <b>Never</b>                 | 998 (2.8)/ 34397 (97.2) | 1.00              |
| <b>Former</b>                | 507 (3.2)/ 15366 (96.8) | 1.03 (0.92-1.17)  |
| <b>Current</b>               | 158 (3.6)/ 4182 (96.4)  | 1.35 (1.13-1.61)  |
| Age                          |                         | 1.02 (1.01-1.03)  |
| BMI                          |                         | 1.23 (1.16-1.31)  |
| Height                       |                         | 1.06 (1.02-1.10)  |
| BMI20                        |                         | 0.76 (0.66-0.87)  |
| HRTcurrent*BMI               |                         | 0.8 (0.65-0.99)   |
| HRTformer*BMI                |                         | 0.90 (0.80-1.00)  |
| HRTcurrent*BMI20             |                         | 1.05 (0.72-1.53)  |
| HRTformer*BMI20              |                         | 1.06 (0.85-1.33)  |
| BMI*BMI20                    |                         | 0.96 (0.90-1.02)  |
| Age at first pregnancy <20   |                         | 0.84 (0.70-1.01)  |
| Age at first pregnancy 20-24 |                         | 0.80 (0.69-0.94)  |
| Age at first pregnancy 25-29 |                         | 0.95 (0.81-1.12)  |
| Age at first pregnancy 30-34 |                         | 1.02 (0.84-1.24)  |
| Age at first pregnancy ≥35   |                         | 1.39 (1.08-1.77)  |
| Age at menopause             |                         | 1.00 (1.00-1.003) |
| Family History               |                         | 1.27 (1.14-1.40)  |
| Postmenopausal status        |                         | 1.04 (0.87-1.24)  |
| Exercise                     |                         | 0.995 (0.99-1.00) |
| Alcohol                      |                         | 1.008 (1.00-1.01) |
| Age at menarche              |                         | 0.99 (0.961.02)   |
| Oophorectomy                 |                         | 0.89 (0.76-1.05)  |
| Ethnic origin                |                         | 1.06 (0.85-1.05)  |

Table S2c. HRT status and BC risk fully adjusted, including HRT use\* current BMI \* BMI20 interaction term  
HRT use status

|              | <b>N%BC/N% no BC</b>    | <b>HR (95% CI)</b> |
|--------------|-------------------------|--------------------|
| <b>Never</b> | 998 (2.8)/ 34397 (97.2) | 1.00               |

|                              |                         |                   |
|------------------------------|-------------------------|-------------------|
| <b>Former</b>                | 507 (3.2)/ 15366 (96.8) | 0.99 (0.88-1.13)  |
| <b>Current</b>               | 158 (3.6)/ 4182 (96.4)  | 1.34 (1.12-1.61)  |
| Age                          |                         | 1.02 (1.01-1.03)  |
| BMI                          |                         | 1.23 (1.16-1.31)  |
| Height                       |                         | 1.06 (1.02-1.10)  |
| BMI                          |                         | 1.24 (1.16-1.31)  |
| BMI20                        |                         | 0.77 (0.66-0.89)  |
| HRTcurrent*BMI               |                         | 0.80 (0.65-0.98)  |
| HRTformer*BMI                |                         | 0.89 (0.79-1.00)  |
| HRTcurrent*BMI20             |                         | 1.04 (0.70-1.55)  |
| HRTformer*BMI20              |                         | 1.01 (0.79-1.29)  |
| HRTcurrent*BMI*BMI20         |                         | 0.99 (0.74-1.31)  |
| HRTformer*BMI*BMI20          |                         | 1.08 (0.94-1.23)  |
| BMI*BMI20                    |                         | 0.94 (0.87-1.02)  |
| Age at first pregnancy <20   |                         | 0.84 (0.70-1.01)  |
| Age at first pregnancy 20-24 |                         | 0.80 (0.69-0.94)  |
| Age at first pregnancy 25-29 |                         | 0.95 (0.81-1.12)  |
| Age at first pregnancy 30-34 |                         | 1.02 (0.84-1.24)  |
| Age at first pregnancy ≥35   |                         | 1.38 (1.08-1.77)  |
| Age at menopause             |                         | 1.00 (1.00-1.003) |
| Family History               |                         | 1.27 (1.14-1.40)  |
| Postmenopausal status        |                         | 1.04 (0.87-1.24)  |
| Exercise                     |                         | 0.995 (0.99-1.00) |
| Alcohol                      |                         | 1.01 (1.00-1.01)  |
| Age at menarche              |                         | 1.00 (0.97-1.03)  |
| Oophorectomy                 |                         | 0.89 (0.76-1.04)  |
| Ethnic origin                |                         | 0.94 (0.75-1.18)  |

### 3d Stratified analysis ER+

BMI20 < 21.6kg/m2

BMI20 < 21.6kg/m2

BMI 20 ≥ 21.6kg/m2

BMI 20 ≥ 21.6kg/m2

|                                     | N% no BC/N% ER+BC      | HR (95%CI) % no BC/ N%ER+ BC            | HR (95%CI)       |
|-------------------------------------|------------------------|-----------------------------------------|------------------|
| Never BMI < 26.4kg/m <sup>2</sup>   | 9920 (97.9)/ 210 (2.1) | 1,00 6276 (98.1)/119 (1.9)              | 0.89 (0.71-1.12) |
| Never BMI ≥26.4kg/m <sup>2</sup>    | 4610 (96.6)/163 (3.4)  | 1.68 (1.37-2.07) 4142 (97.5)/ 357 (2.5) | 1.25 (1.05-1.49) |
| Former BMI< 26.4kg/m <sup>2</sup>   | 4329 (97.5)/ 111 (2.5) | 1.10 (0.86-1.39) 2766 (97.4)/ 73 (2.6)  | 1.12 (0.84-1.47) |
| Former BMI ≥ 26.4kg/m <sup>2</sup>  | 2685 (97.0)/ 83 (3.0)  | 1.36 (1.05-1.78) 5874 (97.3)/165(2.7)   | 1.29 (1.04-1.61) |
| Current BMI < 26.4kg/m <sup>2</sup> | 1409 (96.8)/47 (3.2)   | 1.66 (1.20-2.28) 822 (96.4)/ 31 (3.6)   | 1.87 (1.28-2.74) |
| Current BMI ≥ 26.4kg/m <sup>2</sup> | 569 (96.3)/22 (3.7)    | 2.00 (1.29-3.12) 1453 (97.5)/38 (2.5)   | 1.34 (0.94-1.91) |
